# Supplementary material
Source: MDPI journal article supplement (https://www.mdpi.com/2071-1050/15/7/5644)
Supplement: s1 [file s1]

# Research on Diversification Strategies of Terminal Operators—Evidence from Polish Seaports

Michał Pluciński <sup>1</sup>, Izabela Kotowska <sup>2</sup>, Marta Mańkowska <sup>1</sup> and Ludmiła Filina-Dawidowicz <sup>3,\*</sup>

<sup>1</sup> Institute of Management, University of Szczecin, 8 Cukrowa St., 71-004 Szczecin, Poland

<sup>2</sup> Faculty of Engineering and Economics of Transport, Maritime University of Szczecin, 11 Henryka Pobożnego St., 70-507 Szczecin, Poland

<sup>3</sup> Faculty of Maritime Technology and Transport, West Pomeranian University of Technology in Szczecin, 41 Piastów Ave., 71-065 Szczecin, Poland

\* Correspondence: ludmila.filina@zut.edu.pl

## Supplementary Materials. The Interview Questionnaire

1. Over the past 20 years, did your Company apply a diversification strategy in its port activities?
  - Yes
  - No (this response ends the interview).
2. Please indicate motivations for implementing a diversification strategy in your port activities:
  - changes taking place in maritime trade and transport;
  - changes in the hitherto served cargo markets or geographical markets;
  - emergence of new cargoes or new geographical markets;
  - expectations of cargo shippers regarding extension of the scope of services;
  - changes in the energy policy/ climate pressure;
  - safeguarding against seasonal or sporadic business cycle fluctuations, (e.g., pandemic, armed conflict, etc.);
  - other (please specify).
3. To which area were the diversification measures related:
  - cargo diversification, hereinafter: X;
  - (which?), hereinafter: Y;
  - (which?), hereinafter: Z;
  - (which?), hereinafter: W;
  - (which?), hereinafter: T.
4. Which type of measures did your Company take as part of diversification X:
  - developing the potential for handling general cargoes;
  - developing the potential for handling bulk cargoes;
  - diversifying the potential for handling bulk cargoes;
  - diversifying the potential for handling general cargoes;
  - other (please specify).
5. Was the selected diversification type X accompanied by the Company's investment in:
  - transshipment facilities;
  - handling facilities;
  - storage facilities;
  - infostructure;
  - other (please specify).

6. What was the effect of the measures taken by your Company as part of diversification X:
  - increase in the share of general cargoes in total transshipment volume;
  - increase in the share of specific general cargoes (please specify) in total transshipment volume;
  - increase in the share of bulk cargoes in total transshipment volume;
  - increase in the share of specific bulk cargoes in total transshipment volume, (please specify).
7. Please specify the scope and durability/ tendency of the measures taken by the Company in diversification area Y.
8. Please specify the scope and durability/ tendency of the measures taken by the Company in diversification area Z.
9. Please specify the scope and durability/ tendency of the measures taken by the Company in diversification area Y.
10. Please specify the scope and durability/ tendency of the measures taken by the Company in diversification area T.
